# Supplementary material for: Catalpol induces autophagy and attenuates liver steatosis in ob/ob and high-fat diet-induced obese mice
Source: publisher site journal article supplement (doi:10.18632/aging.102396), 2019-11-07
Supplement: Supplementary file [file aging-v11i21-102396-supplementary-material-SD2.pdf]

## SUPPLEMENTARY TABLE

**Supplementary Table 1. The primers used in the study.**

| Primer names    | Sequences (5'→3')        |
|-----------------|--------------------------|
| Human           |                          |
| TFEB F          | ACCTGTCCGAGACCTATGGG     |
| TFEB R          | CGTCCAGACGCATAATGTTGTC   |
| ATG7 F          | ATGATCCCTGTAACCTAGCCCA   |
| ATG7 R          | CACGGAAGCAAACAACCTCAAC   |
| ATG5 F          | AAAGATGTGCTTCGAGATGTGT   |
| ATG5 R          | CACTTTGTGAGTTACCAACGTCA  |
| BECN1 F         | GGTGTCTCTCGCAGATTCATC    |
| BECN1 R         | TCAGTCTTCGGCTGAGGTTCT    |
| ULK1 F          | AGCACGATTTGGAGGTCGC      |
| ULK1 R          | GCCACGATGTTTTTCATGTTCA   |
| LAMP1 F         | TCTCAGTGAACACTACGACACCA  |
| LAMP1 R         | AGTGTATGTCCCTCTTCCAAAAGC |
| PPAR $\alpha$ F | ATGGTGGACACGGAAAGCC      |
| PPAR $\alpha$ R | CGATGGATTGCGAAATCTCTTGG  |
| CPT1 $\alpha$ F | ATCAATCGGACTCTGGAAACGG   |
| CPT1 $\alpha$ R | TCAGGGAGTAGCGCATGGT      |
| FAS F           | AGATTGTGTGATGAAGGACATGG  |
| FAS R           | TGTTGCTGGTGAGTGTGCATT    |
| ACC1 F          | ATGTCTGGCTTGCACCTAGTA    |
| ACC1 R          | CCCCAAAGCGAGTAACAAATTCT  |
| GAPDH F         | ACAACCTTTGGTATCGTGGAAGG  |
| GAPDH R         | GCCATCACGCCACAGTTTC      |
| Mouse           |                          |
| Ppar F          | TACTGCCGTTTTTCACAAGTGC   |
| Ppar $\alpha$ R | AGGTCGTGTTACAGGTAAGA     |
| Cpt1 $\alpha$ F | AGATCAATCGGACCCTAGACAC   |
| Cpt1 $\alpha$ R | CAGCGAGTAGCGCATAGTCA     |
| Becn1 F         | ATGGAGGGGTCTAAGGCGTC     |
| Becn1 R         | TGGGCTGTGGTAAGTAATGGA    |
| Acc1 F          | AATGAACGTGCAATCCGATTTG   |
| Acc1 R          | ACTCCACATTTGCGTAATTGTTG  |
| Fas F           | GCGGGTTTCGTGAAACTGATAA   |
| Fas R           | GCAAAATGGGCCTCCTTGATA    |
| Gapdh F         | AGGTCGGTGTGAACGGATTTG    |
| Gapdh R         | TGTAGACCATGTAGTTGAGGTCA  |
